# Supplementary material
Source: Research Square preprint supplement (doi:10.21203/rs.3.rs-10068510/v1)
Supplement: Supplementary file 1 [file f2cdb04d646bf310e26b40ab.docx]

1. **Density calculation**

Densities of the composites are calculated using the following equation,

where, and represent the specimen densities in air and distilled water (g/cm³), respectively, and represent the specimen weights in air and water (g).

The equation for the specific gravity is given below,

**Table S1.** Density composition of the laminates manufactured using HLU and VARTM

| **Sample** | **Weight of sample in air ()** | **Weight of sample in water ()** | **Specific gravity ()** | **Measured density ()** |
| --- | --- | --- | --- | --- |
| H-CFRP | 19.385 | 5.691 | 1.416 | 1.413 |
| H-GFRP | 20.917 | 7.968 | 1.615 | 1.611 |
| H-BFRP | 8.572 | 3.512 | 1.694 | 1.69 |
| V-CFRP | 11.2346 | 3.624 | 1.476 | 1.473 |
| V-GFRP | 12.531 | 5.594 | 1.806 | 1.802 |
| V-BFRP | 9.213 | 4.429 | 1.926 | 1.922 |

**Table S2.** Density and composition of the laminates manufactured using HLU and VARTM

| **Sample** | **Density (****g/cm3)** | **Fiber volume fraction (%)** | **Resin fraction (%)** | **Void fraction (%)** |
| --- | --- | --- | --- | --- |
| H-CFRP | 1.41 | 46.80 | 49.06 | 4.14 |
| H-GFRP | 1.61 | 37.55 | 54.83 | 7.62 |
| H-BFRP | 1.69 | 37.90 | 56.53 | 5.57 |
| V-CFRP | 1.47 | 51.47 | 47.25 | 1.28 |
| V-GFRP | 1.80 | 46.62 | 51.53 | 1.85 |
| V-BFRP | 1.92 | 50.20 | 48.43 | 1.37 |

*Comparison with theoretical density*

Theoretical density of the composites based on the rule of mixtures is calculated from the following equation,

where is the fiber volume fraction (expected = 0.5), and are the densities of fiber and resin (g/cm³), respectively.

The percentage difference between the theoretical and measured density is calculated from the equation given below,

**Table S3.** Comparison of experimental density with the theoretical density

| **Sample** | **Expected fiber volume fraction** | **Density of fiber** | **Density of resin** | **Theoretical density ()** | **Measured density ()** | **Percentage difference ()** |
| --- | --- | --- | --- | --- | --- | --- |
| H-CFRP | 0.5 | 1.76 | 1.2 | 1.48 | 1.413 | -4.53 |
| H-GFRP | 0.5 | 2.54 | 1.2 | 1.87 | 1.611 | -13.85 |
| H-BFRP | 0.5 | 2.67 | 1.2 | 1.935 | 1.69 | -12.66 |
| V-CFRP | 0.5 | 1.76 | 1.2 | 1.48 | 1.473 | -0.47 |
| V-GFRP | 0.5 | 2.54 | 1.2 | 1.87 | 1.802 | -3.64 |
| V-BFRP | 0.5 | 2.67 | 1.2 | 1.935 | 1.922 | -0.67 |

1. **Comparison of experimental tensile modulus with theoretical modulus**

*Case 1: Idealized baseline model*

where and are the baseline longitudinal and transverse tensile moduli (GPa), respectively, and are the independent tensile moduli of fiber and resin (GPa), respectively.

| **Sample** | **Density of fiber (g/cm3)** | **Density of resin (g/cm3)** | **(GPa)** | **(GPa)** | **Expected fiber volume fraction** | **(GPa)** | **(GPa)** |
| --- | --- | --- | --- | --- | --- | --- | --- |
| CFRP | 1.76 | 1.2 | 230 | 3.2 | 0.5 | 116.6 | 6.31 |
| GFRP | 2.54 | 1.2 | 80 | 0.5 | 41.6 | 6.15 |
| BFRP | 2.67 | 1.2 | 90 | 0.5 | 46.6 | 6.18 |

*Case 2: Composition-corrected model*

where and are the composition-corrected fiber volume and resin fractions, respectively, and are the composition-corrected longitudinal and transverse tensile moduli (GPa), respectively.

| **Sample** |  |  |  |  |  | **(GPa)** | **(GPa)** |
| --- | --- | --- | --- | --- | --- | --- | --- |
| H-CFRP | 0.468 | 0.4906 | 0.0414 | 0.49 | 0.51 | 109.6 | 5.94 |
| H-GFRP | 0.3755 | 0.5483 | 0.0762 | 0.41 | 0.59 | 32.04 | 4.87 |
| H-BFRP | 0.379 | 0.5653 | 0.0557 | 0.4 | 0.6 | 35.81 | 4.92 |
| V-CFRP | 0.5147 | 0.4725 | 0.0128 | 0.52 | 0.48 | 119.59 | 6.48 |
| V-GFRP | 0.4662 | 0.5153 | 0.0185 | 0.47 | 0.53 | 38.57 | 5.72 |
| V-BFRP | 0.502 | 0.4843 | 0.0137 | 0.51 | 0.49 | 46.82 | 6.21 |

*Experimental results*

| **Sample** | **(GPa)** | **(GPa)** |
| --- | --- | --- |
| H-CFRP | 58.41 | 3.68 |
| H-GFRP | 19.21 | 6.86 |
| H-BFRP | 22.25 | 4.79 |
| V-CFRP | 79.5 | 4.4 |
| V-GFRP | 30.47 | 8.74 |
| V-BFRP | 30.08 | 7.87 |

*Percentage differences*

**Table S4.** Comparison of experimental longitudinal tensile modulus with the baseline and actual values

| **Sample** | **vs**  **(%)** | **vs**  **(%)** | **vs**  **(%)** |
| --- | --- | --- | --- |
| H-CFRP | -6 | -49.91 | -46.71 |
| H-GFRP | -22.98 | -53.82 | -40.04 |
| H-BFRP | -23.15 | -52.25 | -37.87 |
| V-CFRP | 2.56 | -31.82 | -33.52 |
| V-GFRP | -7.28 | -26.75 | -21 |
| V-BFRP | 0.47 | -35.45 | -35.75 |

**Table S5.** Comparison of experimental transverse tensile modulus with the baseline and actual values

| **Sample** | **vs**  **(%)** | **vs**  **(%)** | **vs**  **(%)** |
| --- | --- | --- | --- |
| H-CFRP | -5.9 | -41.7 | -38.05 |
| H-GFRP | -20.86 | 11.48 | 40.86 |
| H-BFRP | -20.39 | -22.5 | -2.64 |
| V-CFRP | 2.66 | -30.29 | -32.1 |
| V-GFRP | -7.05 | 42.03 | 52.8 |
| V-BFRP | 0.48 | 27.34 | 26.73 |

1. **Statistical analysis of mechanical properties using ANOVA:**

**Table S6.** Two-way ANOVA results for tensile and in-plane shear properties of the unidirectional composites

| **Property** | **Source** | **F-value** | **p-value** |
| --- | --- | --- | --- |
| Longitudinal tensile modulus | Manufacturing method (A) | 290.91 | <0.0001 |
| Fiber type (B) | 1362.59 | <0.0001 |
| Interaction (A x B) | 25.61 | <0.0001 |
| Longitudinal tensile strength | Manufacturing method (A) | 353.56 | <0.0001 |
| Fiber type (B) | 497.71 | <0.0001 |
| Interaction (A x B) | 58.34 | <0.0001 |
| Transverse tensile modulus | Manufacturing method (A) | 97.05 | <0.0001 |
| Fiber type (B) | 129.29 | <0.0001 |
| Interaction (A x B) | 12.49 | 0.00117 |
| Transverse tensile strength | Manufacturing method (A) | 137.93 | <0.0001 |
| Fiber type (B) | 418.93 | <0.0001 |
| Interaction (A x B) | 63.37 | <0.0001 |
| In-plane shear modulus | Manufacturing method (A) | 36.35 | <0.0001 |
| Fiber type (B) | 6.00 | 0.01561 |
| Interaction (A x B) | **2.42** | **0.13094** |
| In-plane shear strength | Manufacturing method (A) | 12.05 | 0.00463 |
| Fiber type (B) | 69.44 | <0.0001 |
| Interaction (A x B) | 5.94 | 0.01613 |

**Table S7.** Two-way ANOVA results for compression, flexural, and interlaminar shear properties of the unidirectional composites

| **Property** | **Source** | **F-value** | **p-value** |
| --- | --- | --- | --- |
| Longitudinal compression modulus | Manufacturing method (A) | 156.92 | <0.0001 |
| Fiber type (B) | 321.37 | <0.001 |
| Interaction (A x B) | 15.18 | 0.00052 |
| Longitudinal compression strength | Manufacturing method (A) | **3.03** | **0.10747** |
| Fiber type (B) | 330.71 | <0.0001 |
| Interaction (A x B) | 8.49 | 0.00505 |
| Transverse compression modulus | Manufacturing method (A) | 1908.34 | <0.0001 |
| Fiber type (B) | 36.53 | <0.0001 |
| Interaction (A x B) | 428.19 | <0.0001 |
| Transverse compression strength | Manufacturing method (A) | 282.08 | <0.0001 |
| Fiber type (B) | 1131.01 | <0.0001 |
| Interaction (A x B) | 1429.75 | <0.0001 |
| Flexural modulus | Manufacturing method (A) | 42.40 | <0.0001 |
| Fiber type (B) | 180.06 | <0.0001 |
| Interaction (A x B) | 11.01 | 0.00193 |
| Flexural strength | Manufacturing method (A) | 5.30 | 0.03998 |
| Fiber type (B) | 6.25 | 0.01378 |
| Interaction (A x B) | 21.02 | 0.00020 |
| Interlaminar shear strength | Manufacturing method (A) | 2330.83 | <0.0001 |
| Fiber type (B) | 198.33 | <0.0001 |
| Interaction (A x B) | 89.97 | <0.0001 |

The assumptions of ANOVA, namely normality and homogeneity of variance, are verified using the Kolmogorov-Smirnov (K-S) and the Brown-Forsythe tests, ensuring the validity of the statistical conclusions. For all the mechanical properties, the p-values range between 0.13 and 1.00 for the K-S test and 0.12-0.98 for the Brown-Forsythe test, confirming that the assumptions are satisfied, supporting the validity of the two-way ANOVA analysis for evaluating the effects of fiber type, manufacturing method, and their interaction on the mechanical properties.

**Table S8.** Normality test results

| **Property** | **Statistics** | **p-value** |
| --- | --- | --- |
| Longitudinal tensile modulus | 0.15 | 0.82810 |
| Longitudinal tensile strength | 0.20 | 0.42614 |
| Transverse tensile modulus | 0.16 | 0.75210 |
| Transverse tensile strength | 0.22 | 0.28627 |
| In-plane shear modulus | 0.17 | 0.60679 |
| In-plane shear strength | 0.15 | 0.83904 |
| Longitudinal compression modulus | 0.19 | 0.45087 |
| Longitudinal compression strength | 0.25 | 0.17475 |
| Transverse compression modulus | 0.20 | 0.41028 |
| Transverse compression strength | 0.13 | 0.97778 |
| Flexural modulus | 0.26 | 0.13281 |
| Flexural strength | 0.18 | 0.54560 |
| Interlaminar shear strength | 0.15 | 0.85925 |

**Table S9.** Homogeneity of variance test results

| **Property** | **F-value** | **p-value** |
| --- | --- | --- |
| Longitudinal tensile modulus | 0.65 | 0.67000 |
| Longitudinal tensile strength | 1.13 | 0.39647 |
| Transverse tensile modulus | 0.14 | 0.98045 |
| Transverse tensile strength | 1.11 | 0.40588 |
| In-plane shear modulus | 0.78 | 0.58426 |
| In-plane shear strength | 0.18 | 0.96586 |
| Longitudinal compression modulus | 1.60 | 0.23422 |
| Longitudinal compression strength | 1.02 | 0.44695 |
| Transverse compression modulus | 1.60 | 0.23459 |
| Transverse compression strength | 0.63 | 0.68108 |
| Flexural modulus | 2.21 | 0.12046 |
| Flexural strength | 0.34 | 0.87971 |
| Interlaminar shear strength | 1.07 | 0.42170 |
